# Supplementary material
Source: PubMed Central journal article supplement (PMC5568699)
Supplement: NIHMS891846-supplement-4.pdf [file NIHMS891846-supplement-4.pdf]

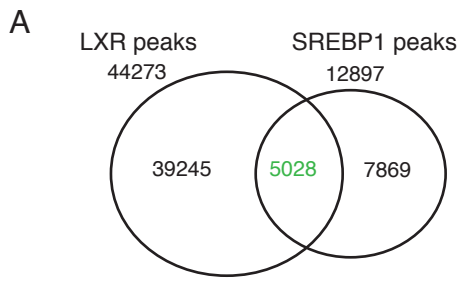

**B** LXR-SREBP1 co-bound genes

| Kegg Term                           | p-value  |
|-------------------------------------|----------|
| Carbon metabolism                   | 1.20E-03 |
| Fatty acid metabolism               | 4.80E-03 |
| Fatty acid biosynthesis, elongation | 4.50E-02 |

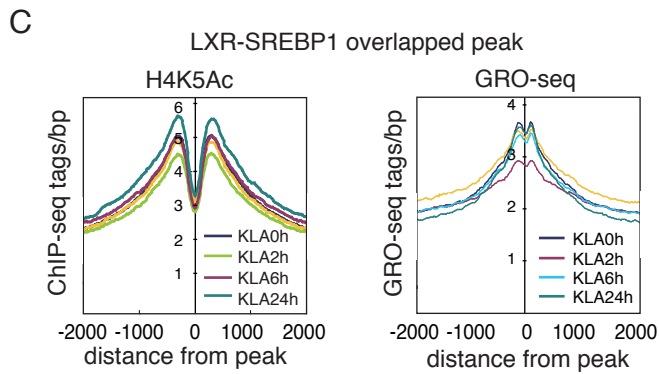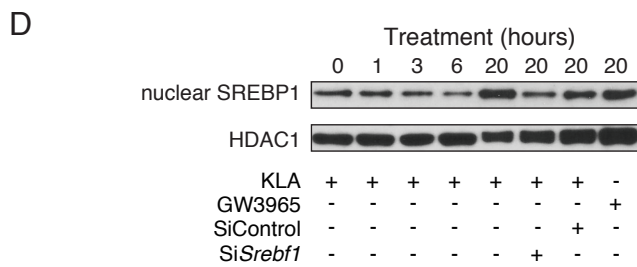

Figure S3
