# Supplementary material
Source: PubMed Central journal article supplement (PMC5568699)

A

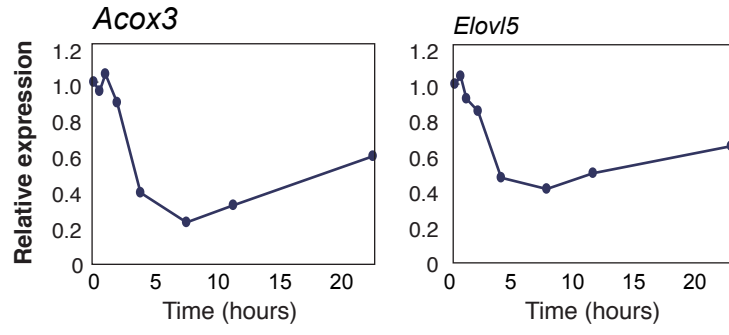

Figure S1

Supplement: NIHMS891846-supplement-2.pdf [file NIHMS891846-supplement-2.pdf]

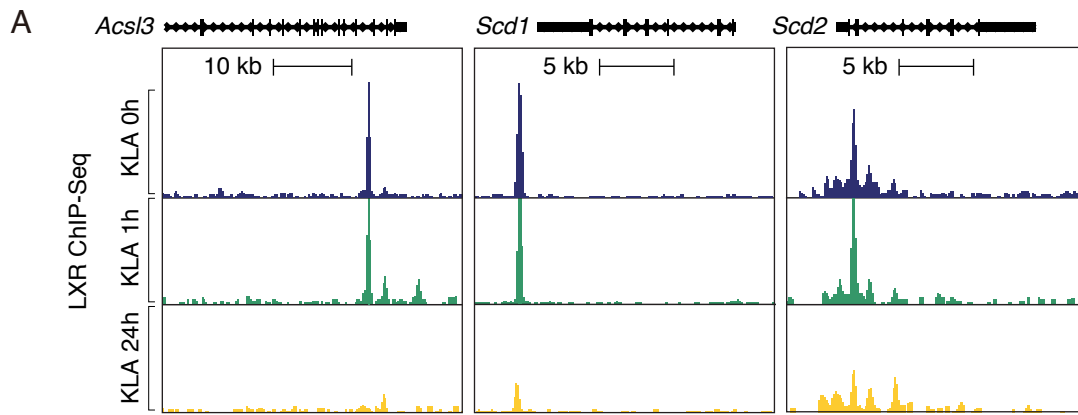

Figure S2

Supplement: NIHMS891846-supplement-3.pdf [file NIHMS891846-supplement-3.pdf]

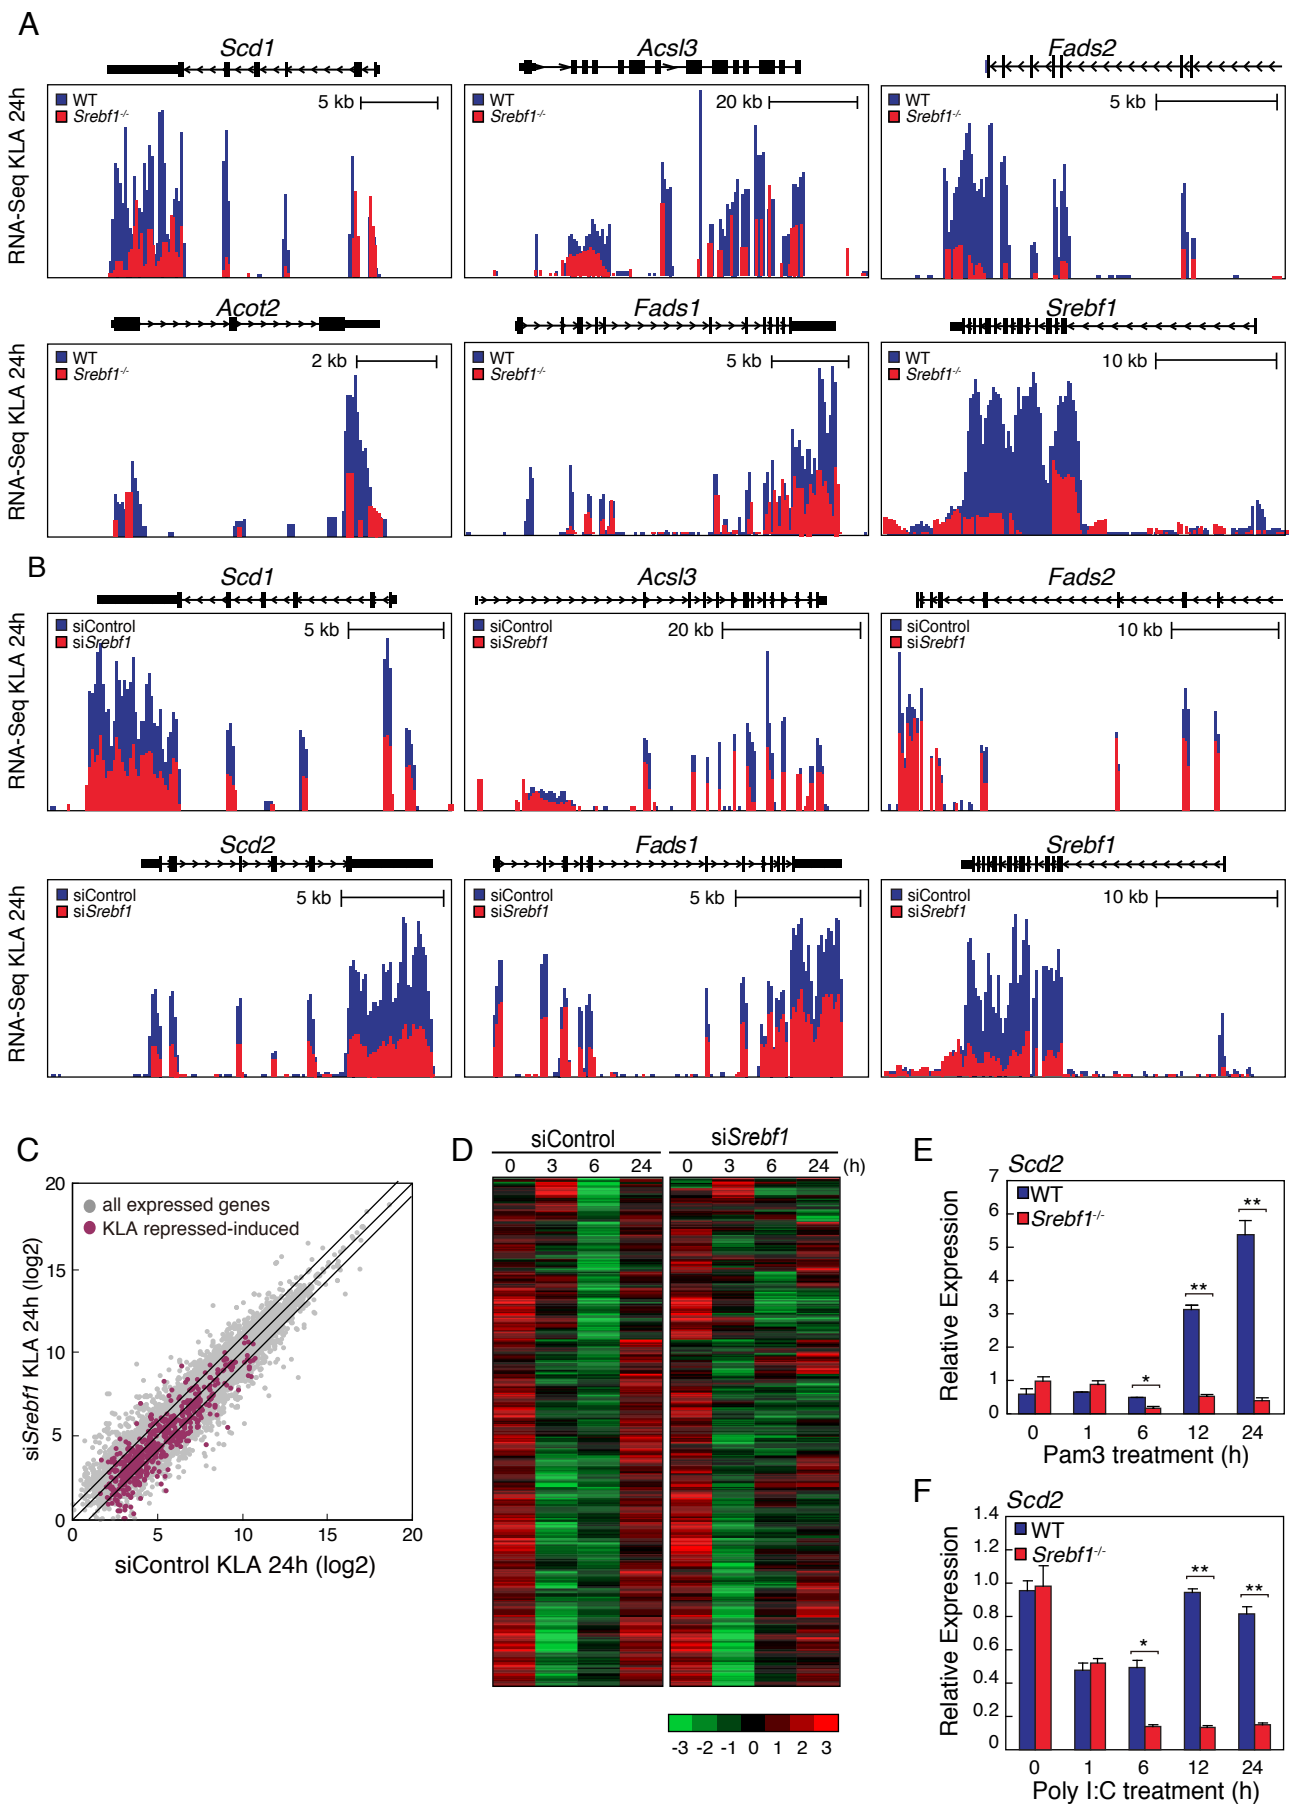

Figure S4

Supplement: NIHMS891846-supplement-5.pdf [file NIHMS891846-supplement-5.pdf]

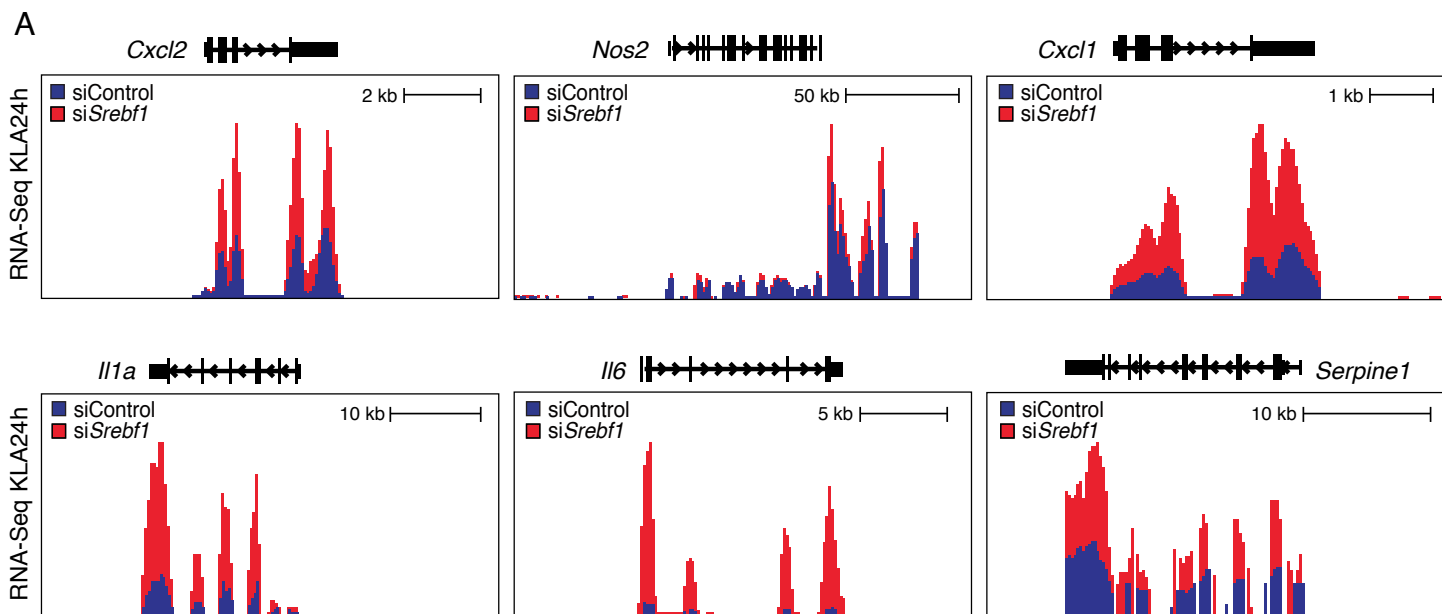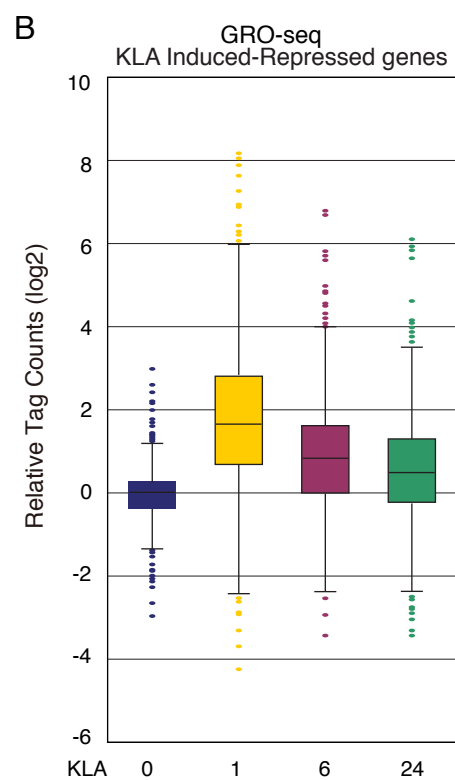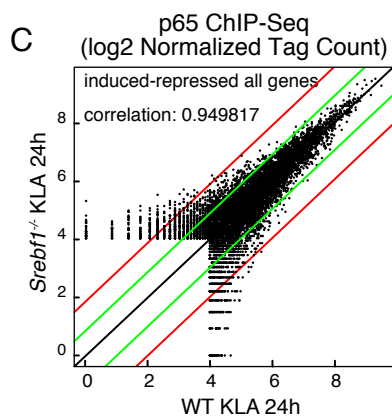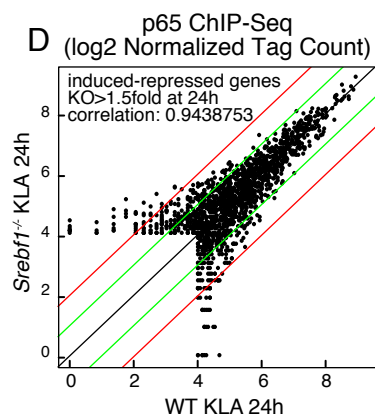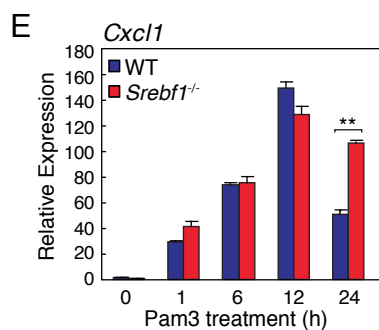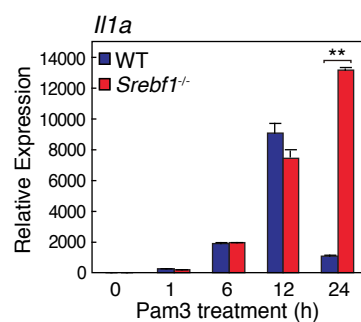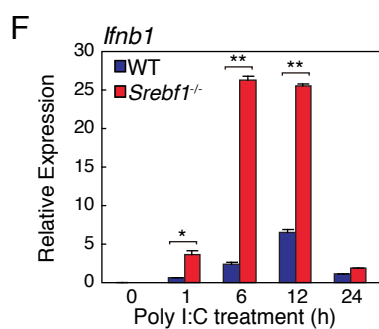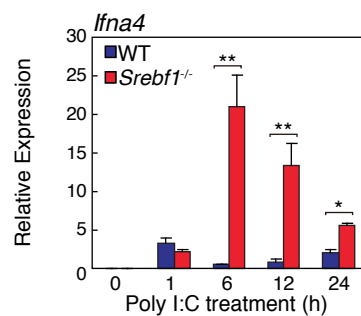

Figure S5

Supplement: NIHMS891846-supplement-6.pdf [file NIHMS891846-supplement-6.pdf]

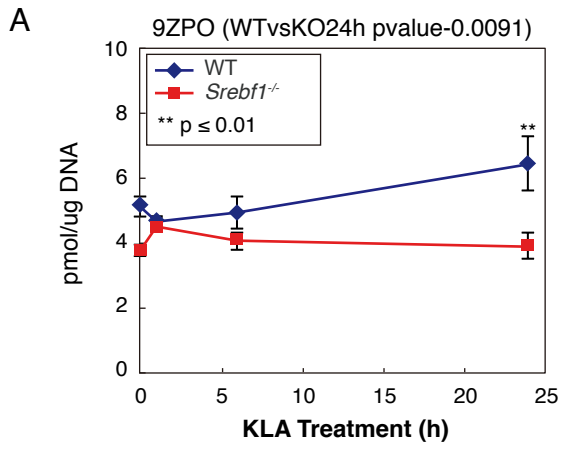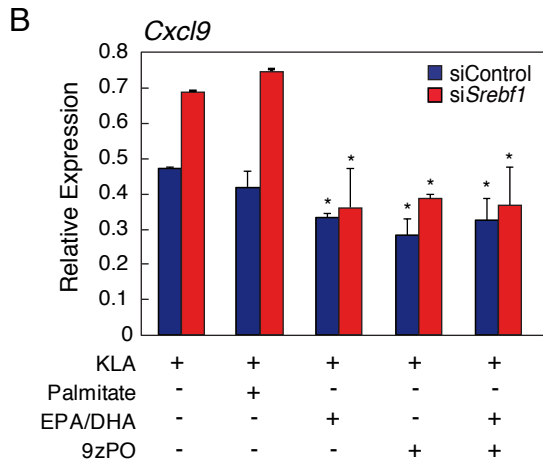

Figure S6

Supplement: NIHMS891846-supplement-7.pdf [file NIHMS891846-supplement-7.pdf]
